# Supplementary material
Source: PubMed Central journal article supplement (PMC4744886)
Supplement: Supp_Fig1.pdf [file Supp_Fig1.pdf]

## Supplementary Data

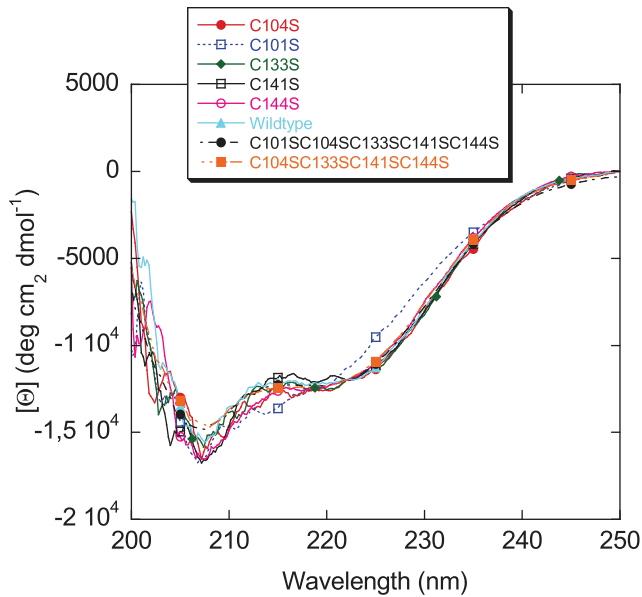

**SUPPLEMENTARY FIG. S1. Far UV CD spectra of wild-type FurA and cysteine mutants.** The CD experiments were carried out in a Jasco J-815 spectropolarimeter using 0.1 cm cuvettes at 25°C. Spectra were recorded with 10  $\mu\text{M}$  protein solution in 10 mM acetic acid/sodium acetate, pH 4. CD, circular dichroism; Fur, ferric uptake regulator.
