# Supplementary material
Source: PubMed Central journal article supplement (PMC4744886)
Supplement: Supp_Fig2.pdf [file Supp_Fig2.pdf]

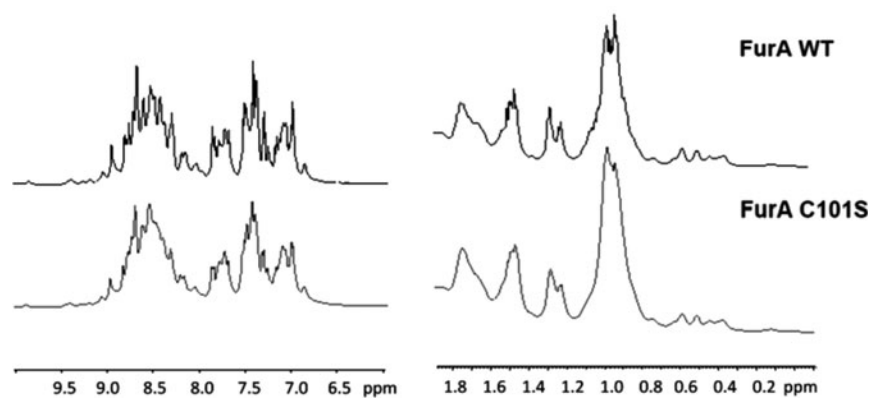

**SUPPLEMENTARY FIG. S2. One-dimensional NMR spectra of wild-type FurA and its C101S mutant.** The range of chemical shifts on the amide (*left*) or methyl (*right*) regions of the spectra is shown. Data were acquired at 500.13 MHz and 25°C on a Bruker Advance DRX-500 spectrometer in 5-mm tubes. Protein samples were prepared at final concentration of 0.3–1.4 mM in 10 mM acetic acid/sodium acetate pH 4 (deuterated buffer).
