# Supplementary material
Source: PubMed Central journal article supplement (PMC4744886)
Supplement: Supp_Fig4.pdf [file Supp_Fig4.pdf]

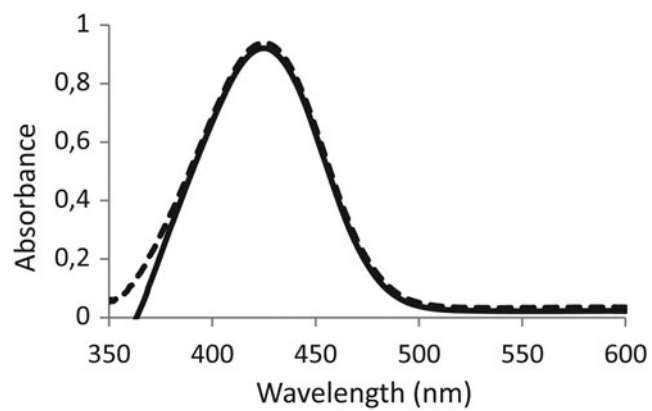

**SUPPLEMENTARY FIG. S4. Analysis of FurA sulfenylation after H<sub>2</sub>O<sub>2</sub> treatment.** UV-visible spectra of prereduced FurA treated (*solid line*) or untreated (*dashed line*) with 1 mM H<sub>2</sub>O<sub>2</sub> for 10 min and then reacted with 100 mM NBD-Cl. The presence of a peak at 420 nm is characteristic for the presence of a thioether-linked NBD.
