# Supplementary material
Source: PubMed Central journal article supplement (PMC4744886)
Supplement: Supp_Fig5.pdf [file Supp_Fig5.pdf]

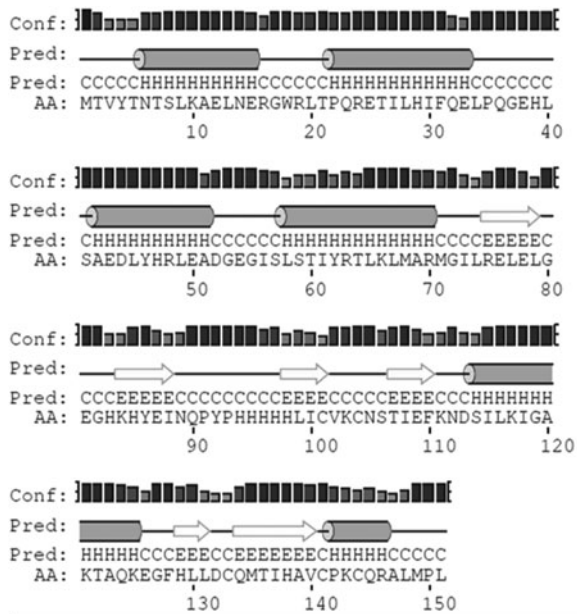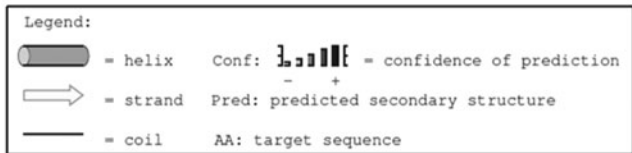

**SUPPLEMENTARY FIG. S5. Secondary structure prediction for FurA from *Anabaena* sp. PCC 7120.** Data were obtained using the PSIPRED web server (<http://bioinf.cs.ucl.ac.uk/psipred/>).
