# Supplementary material
Source: PubMed Central journal article supplement (PMC4744886)
Supplement: Supp_Fig6.pdf [file Supp_Fig6.pdf]

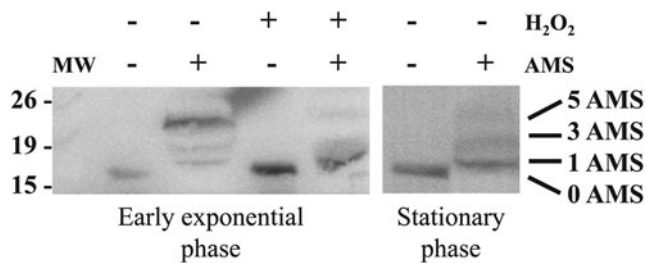

**SUPPLEMENTARY FIG. S6. *In vivo* redox state of FurA under different conditions.** *Anabaena* PCC 7120 cultures either at early exponential or stationary phase were treated with TCA before being alkylated with AMS. Samples without AMS treatment were used as control. Additionally, the early exponential phase *Anabaena* cells were exposed to 0.5 mM H<sub>2</sub>O<sub>2</sub> for 30 min and then subjected to TCA and AMS treatments. Blotting analyses revealed several bands corresponding to FurA proteins with one (size shift of 540 Da), three (size shift of 1620 Da), or five (size shift of 2700 Da) AMS molecules. Molecular weight markers are indicated. TCA, trichloroacetic acid.
