# Supplementary material
Source: PubMed Central journal article supplement (PMC4744886)
Supplement: Supp_Table1.pdf [file Supp_Table1.pdf]

SUPPLEMENTARY TABLE S1. COMPARISON  
OF PROTEIN SECONDARY STRUCTURES (%)  
OF WILD-TYPE FUR A AND C101S  
SPECIES DETERMINED BY FT-IR

| <i>Wave number<br/>range (cm<sup>-1</sup>)</i> | <i>Secondary<br/>structure</i> | <i>FurA</i> | <i>C101S</i> |
|------------------------------------------------|--------------------------------|-------------|--------------|
| 1680–1676                                      | $\beta$ -sheet + $\beta$ -turn | 6.0         | 11.8         |
| 1669                                           | $\beta$ -turn                  | —           | —            |
| 1660–1650                                      | $\alpha$ -helix                | 36.7        | 33.2         |
| 1650–1640                                      | Random                         | 13.4        | 13.6         |
| 1637                                           | Intramolecular                 | 27.3        | 26.2         |
|                                                | $\beta$ -sheet                 |             |              |
| 1625                                           | Intermolecular                 | 16.6        | —            |
|                                                | $\beta$ -sheet                 |             |              |
| 1622–1620                                      | $\beta$ -loop                  | —           | 15.2         |

FT-IR, Fourier transform infrared spectroscopy.
